# Supplementary material
Source: PubMed Central journal article supplement (PMC7422137)
Supplement: advancesADV2020002068-suppl1.pdf [file advancesADV2020002068-suppl1.pdf]

# Bendamustine and rituximab as induction therapy in both transplant eligible and ineligible patients with mantle cell lymphoma

## **Supplementary file**

The seven tables in this Supplementary file describe univariate and multivariate analyses performed in subgroups defined by treatment and/or age, as well as in the overall study dataset. Baseline patient or disease characteristics with  $p < 0.1$  in univariate analysis were entered into the multivariate models, and results with  $p < 0.05$  were considered statistically significant in the final models. ASCT was not entered into the multivariate models due to strong selection bias. To account for guarantee time bias in analyses exploring the impact of receipt of maintenance rituximab on outcomes, univariate landmark analyses were performed by excluding patients with PD, death, or loss to follow-up within 18 months of BR/R-CHOP initiation. Additionally, maintenance rituximab was analyzed as a time-dependent covariate in the multivariate models. Coefficients of all variables were calculated under the assumption of a constant hazard ratio except the time-dependent adjustment term.

1. Univariate and multivariate analyses for PFS and OS in all BR-treated patients

| Characteristic                                                                    | PFS                                  | OS                                   |
|-----------------------------------------------------------------------------------|--------------------------------------|--------------------------------------|
|                                                                                   | HR (95% CI), p                       | HR (95% CI), p                       |
| <b>Univariate analysis (n=190)</b>                                                |                                      |                                      |
| Age >65 years at BR start                                                         | <b>1.84 (1.13-2.99), p=0.014</b>     | <b>2.22 (1.24-3.95), p=0.005</b>     |
| Male                                                                              | 0.85 (0.43-1.37), p=0.512            | 0.92 (0.53-1.59), p=0.752            |
| Performance status >1                                                             | <b>3.67 (2.19-6.13), p&lt;0.001</b>  | <b>4.89 (2.76-8.67), p&lt;0.001</b>  |
| Elevated LDH                                                                      | <b>2.43 (1.35-4.37), p=0.003</b>     | <b>1.93 (0.94-3.96), p=0.074</b>     |
| Ann Arbor stage III/IV                                                            | 1.04 (0.42-2.58), p=0.940            | 1.04 (0.38-2.89), p=0.939            |
| Marrow/blood involvement                                                          | 0.75 (0.46-1.22), p=0.254            | 0.88 (0.49-1.56), p=0.659            |
| B symptoms                                                                        | 1.32 (0.77-2.26), p=0.314            | 1.61 (0.88-2.94), p=0.125            |
| Largest mass ≥5cm                                                                 | 1.61 (0.86-2.99), p=0.135            | <b>2.10 (0.97-4.55), p=0.060</b>     |
| High risk MIPI                                                                    | <b>3.22 (1.72-6.02), p&lt;0.001</b>  | <b>4.28 (2.09-8.78), p&lt;0.001</b>  |
| Blastoid/pleomorphic                                                              | <b>2.73 (1.35-5.50), p=0.013</b>     | <b>3.03 (1.42-6.43), p=0.011</b>     |
| Ki67 ≥30%                                                                         | 1.29 (0.78-2.14), p=0.330            | 1.26 (0.69-2.28), p=0.454            |
| Ki67 ≥50%                                                                         | <b>1.80 (1.07-3.02), p=0.026</b>     | <b>1.97 (1.08-3.57), p=0.026</b>     |
| Maintenance rituximab                                                             |                                      |                                      |
| Unadjusted analysis                                                               | <b>0.11 (0.68-0.19), p&lt;0.001</b>  | <b>0.10 (0.06-0.18), p&lt;0.001</b>  |
| Landmark analysis                                                                 | 1.03 (0.24-4.40), p=0.969            | 1.13 (0.15-8.67), p=0.905            |
| <b>Multivariate analysis excluding maintenance rituximab (n=113 PFS, n=81 OS)</b> |                                      |                                      |
| Age >65 years at BR start                                                         | Not significant                      | Not significant                      |
| Performance status >1                                                             | <b>4.47 (2.29-8.70), p&lt;0.001</b>  | <b>9.47 (3.53-25.40), p&lt;0.001</b> |
| Elevated LDH                                                                      | <b>2.54 (1.34-4.83), p=0.004</b>     | Not significant                      |
| Largest mass ≥5cm                                                                 | Not included                         | Not significant                      |
| High risk MIPI                                                                    | Not significant                      | Not significant                      |
| Blastoid/pleomorphic                                                              | Not significant                      | Not significant                      |
| Ki67 ≥50%                                                                         | <b>2.30 (1.19-4.44), p=0.013</b>     | <b>4.48 (1.68-11.96), p=0.003</b>    |
| <b>Multivariate analysis including maintenance rituximab (n=113 PFS, n=81 OS)</b> |                                      |                                      |
| Age >65 years at BR start                                                         | Not significant                      | Not significant                      |
| Performance status >1                                                             | Not significant                      | <b>2.56 (1.09-6.01), p=0.032</b>     |
| Elevated LDH                                                                      | <b>2.81 (1.40-5.63), p=0.004</b>     | Not significant                      |
| Largest mass ≥5cm                                                                 | Not included                         | Not significant                      |
| High risk MIPI                                                                    | Not significant                      | Not significant                      |
| Blastoid/pleomorphic                                                              | Not significant                      | Not significant                      |
| Ki67 ≥50%                                                                         | Not significant                      | Not significant                      |
| Maintenance rituximab                                                             | <b>0.01 (0.002-0.11), p&lt;0.001</b> | <b>0.02 (0.002-0.12), p&lt;0.001</b> |

2. Univariate and multivariate analyses for PFS and OS in BR-treated patients age ≤65 years

| Characteristic                                                                   | PFS                                 | OS                                   |
|----------------------------------------------------------------------------------|-------------------------------------|--------------------------------------|
|                                                                                  | HR (95% CI), p                      | HR (95% CI), p                       |
| <b>Univariate analysis (n=89)</b>                                                |                                     |                                      |
| Male                                                                             | 0.78 (0.36-1.68), p=0.517           | 0.59 (0.23-1.52), p=0.272            |
| Performance status >1                                                            | <b>3.95 (1.63-9.56), p=0.002</b>    | <b>6.38 (2.35-17.33), p&lt;0.001</b> |
| Elevated LDH                                                                     | <b>3.97 (1.56-10.09), p=0.004</b>   | <b>3.96 (1.16-13.55), p=0.028</b>    |
| Ann Arbor stage III/IV                                                           | 1.44 (0.20-10.70), p=0.720          | 0.93 (1.22-7.05), p=0.943            |
| Marrow/blood involvement                                                         | 0.92 (0.39-2.19), p=0.845           | 1.10 (0.36-3.38), p=0.870            |
| B symptoms                                                                       | 1.34 (0.58-3.10), p=0.497           | 1.30 (0.45-3.75), p=0.624            |
| Largest mass ≥5cm                                                                | 2.03 (0.74-5.55), p=0.166           | <b>1.65 (0.46-5.86), p=0.441</b>     |
| High risk MIPI                                                                   | <b>3.56 (1.33-9.55), p=0.012</b>    | <b>7.08 (2.15-23.37), p&lt;0.001</b> |
| Blastoid/pleomorphic                                                             | <b>3.20 (1.19-8.60), p=0.021</b>    | <b>3.95 (1.28-12.14), p=0.017</b>    |
| Ki67 ≥30%                                                                        | 1.49 (0.66-3.36), p=0.332           | 1.95 (0.69-5.49), p=0.204            |
| Ki67 ≥50%                                                                        | 1.90 (0.81-4.50), p=0.143           | <b>2.66 (0.95-7.48), p=0.063</b>     |
| Maintenance rituximab                                                            |                                     |                                      |
| Unadjusted analysis                                                              | <b>0.12 (0.05-0.28), p&lt;0.001</b> | <b>0.15 (0.06-0.39), p&lt;0.001</b>  |
| Landmark analysis                                                                | Not evaluable*                      | Not evaluable*                       |
| <b>Multivariate analysis excluding maintenance rituximab (n=64 PFS, n=42 OS)</b> |                                     |                                      |
| Performance status >1                                                            | <b>5.88 (2.0-17.3), p=0.001</b>     | <b>10.04 (1.63-61.71), p=0.013</b>   |
| Largest mass ≥5cm                                                                | Not included                        | Not significant                      |
| Elevated LDH                                                                     | Not significant                     | Not significant                      |
| High risk MIPI                                                                   | Not significant                     | Not significant                      |
| Blastoid/pleomorphic                                                             | <b>8.61 (2.49-29.75), p=0.001</b>   | <b>20.26 (3.29-124.5), p=0.001</b>   |
| Ki67 ≥50%                                                                        | Not included                        | Not significant                      |
| <b>Multivariate analysis including maintenance rituximab (n=64 PFS, n=42 OS)</b> |                                     |                                      |
| Performance status >1                                                            | Not significant                     | <b>8.77 (1.36-56.64), p=0.022</b>    |
| Largest mass ≥5cm                                                                | Not included                        | Not significant                      |
| Elevated LDH                                                                     | Not significant                     | Not significant                      |
| High risk MIPI                                                                   | Not significant                     | Not significant                      |
| Blastoid/pleomorphic                                                             | <b>5.60 (1.50-20.85), p=0.010</b>   | <b>10.39 (1.43-75.31), p=0.021</b>   |
| Ki67 ≥50%                                                                        | Not included                        | Not significant                      |
| Maintenance rituximab                                                            | <b>0.13 (0.04-0.41), p&lt;0.001</b> | Not significant                      |

\*All patients received MR after the 18 month landmark.

3. Univariate and multivariate analyses for PFS and OS in BR-treated patients age >65 years

| Characteristic                                                                   | PFS                                 | OS                                  |
|----------------------------------------------------------------------------------|-------------------------------------|-------------------------------------|
|                                                                                  | HR (95% CI), p                      | HR (95% CI), p                      |
| <b>Univariate analysis (n=101)</b>                                               |                                     |                                     |
| Male                                                                             | 0.85 (0.47-1.56), p=0.607           | 1.09 (0.55-2.19), p=0.800           |
| Performance status >1                                                            | <b>3.33 (1.76-6.30), p&lt;0.001</b> | <b>3.84 (1.91-7.73), p&lt;0.001</b> |
| Elevated LDH                                                                     | <b>2.01 (0.88-4.62), p=0.098</b>    | 1.63 (0.59-4.53), p=0.346           |
| Ann Arbor stage III/IV                                                           | 0.99 (0.35-2.77), p=0.981           | 1.24 (0.38-4.06), p=0.722           |
| Marrow/blood involvement                                                         | 0.71 (0.39-1.30), p=0.268           | 0.89 (0.45-1.76), p=0.737           |
| B symptoms                                                                       | 1.64 (0.80-3.33), p=0.174           | <b>2.16 (1.03-4.53), p=0.041</b>    |
| Largest mass ≥5cm                                                                | 1.64 (0.73-3.72), p=0.235           | <b>2.45 (0.92-6.55), p=0.074</b>    |
| High risk MIPI                                                                   | <b>2.75 (1.21-6.26), p=0.016</b>    | <b>2.89 (1.16-7.18), p=0.023</b>    |
| Blastoid/pleomorphic                                                             | <b>2.43 (0.67-6.81), p=0.092</b>    | <b>3.18 (1.12-9.07), p=0.030</b>    |
| Ki67 ≥30%                                                                        | 0.98 (0.51-1.90), p=0.948           | 0.77 (0.37-1.61), p=0.491           |
| Ki67 ≥50%                                                                        | 1.60 (0.84-3.05), p=0.155           | 1.50 (0.72-3.12), p=0.275           |
| Maintenance rituximab                                                            |                                     |                                     |
| Unadjusted analysis                                                              | <b>0.11 (0.06-0.21), p&lt;0.001</b> | <b>0.09 (0.05-0.19), p&lt;0.001</b> |
| Landmark analysis                                                                | 1.16 (0.15-9.05), p=0.889           | 0.48 (0.06-4.18), p=0.506           |
| <b>Multivariate analysis excluding maintenance rituximab (n=60 PFS, n=42 OS)</b> |                                     |                                     |
| Performance status >1                                                            | <b>4.17 (1.95-8.91), p&lt;0.001</b> | Not significant                     |
| Elevated LDH                                                                     | <b>3.04 (1.23-7.50), p=0.016</b>    | Not included                        |
| B symptoms                                                                       | Not included                        | <b>6.20 (1.69-22.85), p=0.006</b>   |
| Largest mass ≥5cm                                                                | Not included                        | Not significant                     |
| High risk MIPI                                                                   | Not significant                     | <b>4.83 (1.42-16.45), p=0.012</b>   |
| Blastoid/pleomorphic                                                             | Not significant                     | Not significant                     |
| <b>Multivariate analysis including maintenance rituximab (n=60 PFS, n=42 OS)</b> |                                     |                                     |
| Performance status >1                                                            | <b>2.80 (1.22-6.42), p=0.015</b>    | Not significant                     |
| Elevated LDH                                                                     | Not significant                     | Not included                        |
| B symptoms                                                                       | Not included                        | Not significant                     |
| Largest mass ≥5cm                                                                | Not included                        | <b>4.0 (1.15-13.89), p=0.029</b>    |
| High risk MIPI                                                                   | Not significant                     | Not significant                     |
| Blastoid/pleomorphic                                                             | Not significant                     | Not significant                     |
| Maintenance rituximab                                                            | <b>0.10 (0.04-0.26), p&lt;0.001</b> | <b>0.06 (0.02-0.20), p&lt;0.001</b> |

4. Univariate and multivariate analyses for PFS and OS in the entire study cohort including BR-treated and R-CHOP-treated patients

| Characteristic                                                                     | PFS                                 | OS                                  |
|------------------------------------------------------------------------------------|-------------------------------------|-------------------------------------|
|                                                                                    | HR (95% CI), p                      | HR (95% CI), p                      |
| <b>Univariate analysis (n=438)</b>                                                 |                                     |                                     |
| Age >65 years at chemo start                                                       | <b>1.99 (1.55-2.55), p&lt;0.001</b> | <b>2.26 (1.71-2.99), p&lt;0.001</b> |
| Male                                                                               | 0.98 (0.75-1.28), p=0.871           | 1.04 (0.77-1.40), p=0.809           |
| Performance status >1                                                              | <b>2.72 (2.06-3.59), p&lt;0.001</b> | <b>2.78 (2.09-3.68), p&lt;0.001</b> |
| Elevated LDH                                                                       | <b>1.85 (1.39-2.45), p&lt;0.001</b> | <b>1.74 (1.28-2.35), p&lt;0.001</b> |
| Ann Arbor stage III/IV                                                             | <b>1.82 (1.10-3.0-2), p=0.021</b>   | <b>1.88 (1.07-3.31), p=0.027</b>    |
| Marrow/blood involvement                                                           | 1.26 (0.95-1.67), p=0.116           | <b>1.35 (0.97-1.86), p=0.072</b>    |
| B symptoms                                                                         | <b>1.64 (1.26-2.14), p&lt;0.001</b> | <b>1.67 (1.26-2.23), p&lt;0.001</b> |
| Largest mass ≥5cm                                                                  | <b>1.37 (1.04-1.81), p=0.027</b>    | <b>1.35 (0.99-1.84), p=0.056</b>    |
| High risk MIPI                                                                     | <b>3.03 (2.21-4.16), p&lt;0.001</b> | <b>3.98 (2.82-5.60), p&lt;0.001</b> |
| Blastoid/pleomorphic                                                               | <b>2.12 (1.48-3.05), p&lt;0.001</b> | <b>2.26 (1.54-3.31), p&lt;0.001</b> |
| Ki67 ≥30%                                                                          | 1.18 (0.88-1.59), p=0.279           | 1.30 (0.93-1.82), p=0.126           |
| Ki67 ≥50%                                                                          | 1.21 (0.88-1.70), p=0.237           | <b>1.35 (0.95-1.91), p=0.098</b>    |
| BR                                                                                 | <b>0.65 (0.49-0.86), p=0.003</b>    | <b>0.73 (0.53-1.01), p=0.055</b>    |
| Maintenance rituximab                                                              |                                     |                                     |
| Unadjusted analysis                                                                | <b>0.26 (0.20-0.34), p&lt;0.001</b> | <b>0.24 (0.18-0.32), p&lt;0.001</b> |
| Landmark analysis                                                                  | <b>0.53 (0.38-0.74), p&lt;0.001</b> | <b>0.50 (0.34-0.74), p=0.001</b>    |
| <b>Multivariate analysis excluding maintenance rituximab (n=262 PFS, n=193 OS)</b> |                                     |                                     |
| Age >65 years at chemo start                                                       | <b>2.44 (1.75-3.40), p&lt;0.001</b> | <b>2.01 (1.25-3.24), p=0.004</b>    |
| Performance status >1                                                              | <b>1.51 (1.04-2.20), p=0.032</b>    | <b>2.22 (1.32-3.75), p=0.003</b>    |
| Elevated LDH                                                                       | <b>1.43 (1.02-2.01), p=0.038</b>    | Not significant                     |
| Ann Arbor stage III/IV                                                             | <b>1.86 (1.02-3.42), p=0.045</b>    | Not significant                     |
| Marrow/blood involvement                                                           | Not included                        | <b>1.73 (1.05-2.85), p=0.032</b>    |
| B symptoms                                                                         | Not significant                     | Not significant                     |
| Largest mass ≥5cm                                                                  | Not significant                     | Not significant                     |
| High risk MIPI                                                                     | Not significant                     | <b>2.61 (1.45-4.70), p=0.001</b>    |
| Blastoid/pleomorphic                                                               | <b>1.97 (1.24-3.14), p=0.004</b>    | Not significant                     |
| Ki67 ≥50%                                                                          | Not included                        | Not significant                     |
| BR                                                                                 | <b>0.58 (0.39-0.86), p=0.007</b>    | <b>0.49 (0.29-0.84), p=0.010</b>    |
| <b>Multivariate analysis including maintenance rituximab (n=262 PFS, n=193 OS)</b> |                                     |                                     |
| Age >65 years at chemo start                                                       | <b>1.50 (1.06-2.11), p=0.023</b>    | Not significant                     |
| Performance status >1                                                              | <b>1.57 (1.09-2.56), p=0.016</b>    | <b>2.43 (1.44-4.08), p=0.001</b>    |
| Ann Arbor stage III/IV                                                             | <b>2.63 (1.42-4.83), p=0.001</b>    | Not significant                     |
| Marrow/blood involvement                                                           | Not included                        | <b>1.85 (1.13-3.04), p=0.015</b>    |
| B symptoms                                                                         | Not significant                     | Not significant                     |
| Largest mass ≥5cm                                                                  | Not significant                     | Not significant                     |
| High risk MIPI                                                                     | Not significant                     | <b>3.64 (2.01-6.58), p&lt;0.001</b> |
| Blastoid/pleomorphic                                                               | <b>3.07 (1.94-4.86), p&lt;0.001</b> | Not significant                     |
| Ki67 ≥50%                                                                          | Not included                        | Not significant                     |
| BR                                                                                 | 1.20 (0.78-1.85), p=0.408           | 1.0 (0.56-1.78), p=0.99             |
| Maintenance rituximab                                                              | <b>0.09 (0.05-0.17), p&lt;0.001</b> | <b>0.18 (0.11-0.28), p&lt;0.001</b> |

5. Univariate and multivariate analyses for PFS and OS in BR-treated and R-CHOP-treated patients age ≤65 years

| Characteristic                                                                      | PFS                                 | OS                                  |
|-------------------------------------------------------------------------------------|-------------------------------------|-------------------------------------|
|                                                                                     | HR (95% CI), p                      | HR (95% CI), p                      |
| <b>Univariate analysis (n=231)</b>                                                  |                                     |                                     |
| Male                                                                                | 1.14 (0.76-1.71), p=0.544           | 1.10 (0.69-1.76), p=0.676           |
| Performance status >1                                                               | <b>2.44 (1.59-3.75), p&lt;0.001</b> | <b>2.82 (1.79-4.44), p&lt;0.001</b> |
| Elevated LDH                                                                        | <b>2.47 (1.67-3.66), p&lt;0.001</b> | <b>2.17 (1.38-3.40), p=0.001</b>    |
| Ann Arbor stage III/IV                                                              | <b>2.35 (1.03-5.34), p=0.043</b>    | <b>2.77 (1.01-7.55), p=0.047</b>    |
| Marrow/blood involvement                                                            | <b>1.62 (1.0-2.63), p=0.050</b>     | <b>1.70 (0.95-2.97), p=0.075</b>    |
| B symptoms                                                                          | <b>2.05 (1.41-2.98), p&lt;0.001</b> | <b>1.86 (1.22-2.83), p=0.004</b>    |
| Largest mass ≥5cm                                                                   | <b>1.57 (1.06-2.33), p=0.026</b>    | 1.30 (0.83-2.05), p=0.255           |
| High risk MIPI                                                                      | <b>2.57 (1.52-4.34), p&lt;0.001</b> | <b>3.38 (1.93-5.92), p&lt;0.001</b> |
| Blastoid/pleomorphic                                                                | <b>3.06 (1.84-5.07), p&lt;0.001</b> | <b>3.02 (1.73-5.27), p&lt;0.001</b> |
| Ki67 ≥30%                                                                           | 1.27 (0.81-1.97), p=0.297           | 1.39 (0.83-2.33), p=0.210           |
| Ki67 ≥50%                                                                           | 1.16 (0.72-1.89), p=0.545           | 1.37 (0.79-2.38), p=0.264           |
| BR                                                                                  | <b>0.69 (0.42-1.03), p=0.069</b>    | 0.64 (0.37-1.11), p=0.115           |
| Maintenance rituximab                                                               |                                     |                                     |
| Unadjusted analysis                                                                 | <b>0.34 (0.23-0.48), p&lt;0.001</b> | <b>0.29 (0.19-0.43), p&lt;0.001</b> |
| Landmark analysis                                                                   | 0.73 (0.45-1.18), p=0.194           | 0.65 (0.37-1.14), p=0.129           |
| <b>Multivariate analysis excluding maintenance rituximab (n=154 PFS, n=184 OS)</b>  |                                     |                                     |
| Performance status >1                                                               | Not significant                     | <b>2.08 (1.19-3.64), p=0.010</b>    |
| Elevated LDH                                                                        | <b>1.86 (1.17-2.96), p=0.009</b>    | Not significant                     |
| Ann Arbor stage III/IV                                                              | Not significant                     | Not significant                     |
| Marrow/blood involvement                                                            | Not significant                     | Not significant                     |
| B symptoms                                                                          | Not significant                     | Not significant                     |
| Largest mass ≥5cm                                                                   | Not significant                     | Not included                        |
| High risk MIPI                                                                      | Not significant                     | <b>2.49 (1.32-4.69), p=0.005</b>    |
| Blastoid/pleomorphic                                                                | <b>2.87 (1.54-5.36), p=0.001</b>    | <b>3.29 (1.71-6.32), p&lt;0.001</b> |
| BR                                                                                  | 0.74 (0.41-1.34), p=0.324           | 0.57 (0.29-1.10), p=0.094           |
| <b>Multivariate analysis including maintenance rituximab (n= 154 PFS, n=184 OS)</b> |                                     |                                     |
| Performance status >1                                                               | Not significant                     | <b>2.24 (1.27-3.96), p=0.006</b>    |
| Elevated LDH                                                                        | <b>1.65 (1.04-2.62), p=0.034</b>    | Not significant                     |
| Ann Arbor stage III/IV                                                              | Not significant                     | <b>4.85 (1.68-13.96), p=0.003</b>   |
| Marrow/blood involvement                                                            | <b>2.33 (1.31-4.12), p=0.004</b>    | Not significant                     |
| B symptoms                                                                          | Not significant                     | Not significant                     |
| Largest mass ≥5cm                                                                   | Not significant                     | Not included                        |
| High risk MIPI                                                                      | Not significant                     | Not significant                     |
| Blastoid/pleomorphic                                                                | <b>2.77 (1.47-5.23), p=0.002</b>    | <b>3.42 (1.76-6.65), p&lt;0.001</b> |
| BR                                                                                  | 1.06 (0.58-1.96), p=0.851           | 0.70 (0.36-1.38), p=0.303           |
| Maintenance rituximab                                                               | <b>0.12 (0.05-0.27), p&lt;0.001</b> | <b>0.21 (0.13-0.35), p&lt;0.001</b> |

6. Univariate and multivariate analyses for PFS and OS in BR-treated and R-CHOP-treated patients age >65 years

| Characteristic                                                                  | PFS                                 | OS                                  |
|---------------------------------------------------------------------------------|-------------------------------------|-------------------------------------|
|                                                                                 | HR (95% CI), p                      | HR (95% CI), p                      |
| <b>Univariate analysis (n=207)</b>                                              |                                     |                                     |
| Male                                                                            | 0.90 (0.63-1.29), p=0.563           | 1.03 (0.70-1.53), p=0.872           |
| Performance status >1                                                           | <b>2.77 (1.91-4.02), p&lt;0.001</b> | <b>2.42 (1.64-3.58), p&lt;0.001</b> |
| Elevated LDH                                                                    | 1.37 (0.91-2.08), p=0.132           | 1.45 (0.93-2.27), p=0.104           |
| Ann Arbor stage III/IV                                                          | 1.52 (0.80-2.91), p=0.202           | 1.52 (0.77-2.99), p=0.233           |
| Marrow/blood involvement                                                        | 1.19 (0.83-1.70), p=0.351           | 1.40 (0.94-2.08), p=0.100           |
| B symptoms                                                                      | <b>1.56 (1.05-2.30), p=0.028</b>    | <b>1.77 (1.18-2.65), p=0.006</b>    |
| Largest mass ≥5cm                                                               | 1.18 (0.80-1.74), p=0.403           | 1.37 (0.90-2.09), p=0.139           |
| High risk MIPI                                                                  | <b>2.63 (1.73-3.99), p&lt;0.001</b> | <b>3.57 (2.25-5.67), p&lt;0.001</b> |
| Blastoid/pleomorphic                                                            | 1.39 (0.82-2.36), p=0.223           | <b>1.59 (0.93-2.70), p=0.087</b>    |
| Ki67 ≥30%                                                                       | 0.95 (0.63-1.43), p=0.805           | 1.11 (0.71-1.73), p=0.658           |
| Ki67 ≥50%                                                                       | 1.17 (0.76-1.79), p=0.480           | 1.24 (0.78-1.96), p=0.360           |
| BR                                                                              | <b>0.55 (0.39-0.79), p=0.001</b>    | <b>0.68 (0.46-1.02), p=0.065</b>    |
| Maintenance rituximab                                                           |                                     |                                     |
| Unadjusted analysis                                                             | <b>0.24 (0.16-0.35), p&lt;0.001</b> | <b>0.25 (0.16-0.38), p&lt;0.001</b> |
| Landmark analysis                                                               | <b>0.44 (0.26-0.73), p=0.001</b>    | <b>0.54 (0.29-0.99), p=0.049</b>    |
| <b>Multivariate analysis excluding maintenance rituximab (n=131 PFS and OS)</b> |                                     |                                     |
| Performance status >1                                                           | <b>2.10 (1.32-3.36), p=0.002</b>    | Not significant                     |
| B symptoms                                                                      | Not significant                     | <b>1.94 (1.16-3.23), p=0.012</b>    |
| High risk MIPI                                                                  | <b>1.73 (1.07-2.79), p=0.025</b>    | <b>3.46 (2.15-5.58), p&lt;0.001</b> |
| Blastoid/pleomorphic                                                            | Not included                        | Not significant                     |
| BR                                                                              | <b>0.57 (0.36-0.90), p=0.015</b>    | 0.73 (0.43-1.27), p=0.266           |
| <b>Multivariate analysis including maintenance rituximab (n=131 PFS and OS)</b> |                                     |                                     |
| Performance status >1                                                           | <b>1.90 (1.19-3.03), p=0.007</b>    | Not significant                     |
| B symptoms                                                                      | Not significant                     | Not significant                     |
| High risk MIPI                                                                  | <b>1.77 (1.11-2.84), p=0.018</b>    | <b>3.13 (1.88-5.19), p&lt;0.001</b> |
| Blastoid/pleomorphic                                                            | Not included                        | <b>2.60 ( 1.21-5.61), p=0.015</b>   |
| BR                                                                              | 0.68 (0.40-1.15), p=0.149           | 0.59 (0.33-1.07), p=0.084           |
| Maintenance rituximab                                                           | <b>0.21 (0.13-0.33), p&lt;0.001</b> | <b>0.16 (0.08-0.30), p&lt;0.001</b> |

7. Univariate and multivariate analyses for PFS and OS in BR-treated and R-CHOP-treated patients who received ASCT

| Characteristic                                                                     | PFS                                 | OS                               |
|------------------------------------------------------------------------------------|-------------------------------------|----------------------------------|
|                                                                                    | HR (95% CI), p                      | HR (95% CI), p                   |
| <b>Univariate analysis (n=157)</b>                                                 |                                     |                                  |
| Age >65 years at chemo start                                                       | 1.78 (0.81-3.94), p=0.152           | <b>2.34 (0.97-5.61), p=0.057</b> |
| Male                                                                               | 1.13 (0.63-2.02), p=0.687           | 1.03 (0.51-2.10), p=0.935        |
| Performance status >1                                                              | <b>1.97 (1.02-3.81), p=0.045</b>    | <b>2.36 (1.14-4.86), p=0.020</b> |
| Elevated LDH                                                                       | <b>1.98 (1.14-3.44), p=0.015</b>    | 1.42 (0.73-2.77), p=0.304        |
| Marrow/blood involvement                                                           | <b>2.69 (1.08-6.72), p=0.034</b>    | 2.58 (0.79-8.37), p=0.115        |
| B symptoms                                                                         | <b>2.66 (1.58-4.46), p&lt;0.001</b> | <b>2.12 (1.14-3.92), p=0.017</b> |
| Largest mass ≥5cm                                                                  | <b>2.08 (1.20-3.64), p=0.010</b>    | 1.47 (0.77-2.80), p=0.248        |
| High risk MIPI                                                                     | 1.90 (0.86-4.21), p=0.114           | <b>2.36 (0.97-5.78), p=0.059</b> |
| Blastoid/pleomorphic                                                               | 1.70 (0.68-4.24), p=0.258           | 1.75 (0.62-4.93), p=0.288        |
| Ki67 ≥30%                                                                          | 1.27 (0.71-2.27), p=0.419           | 1.38 (0.68-2.79), p=0.373        |
| Ki67 ≥50%                                                                          | 1.22 (0.61-2.44), p=0.569           | 1.07 (0.48-2.40), p=0.870        |
| BR                                                                                 | 0.63 (0.34-1.16), p=0.139           | 0.66 (0.29-1.48), p=0.308        |
| Maintenance rituximab                                                              |                                     |                                  |
| Unadjusted analysis                                                                | 0.61 (0.26-1.41), p=0.248           | <b>0.45 (0.17-1.14), p=0.092</b> |
| Landmark analysis                                                                  | 0.80 (0.29-2.21), p=0.661           | 0.58 (0.18-1.92), p=0.375        |
| <b>Multivariate analysis excluding maintenance rituximab (n=108 PFS, n=126 OS)</b> |                                     |                                  |
| Age >65 at chemo start                                                             | Not included                        | Not significant                  |
| Performance status >1                                                              | Not significant                     | <b>2.38 (1.14-4.96), p=0.021</b> |
| Elevated LDH                                                                       | Not significant                     | Not included                     |
| Marrow/blood involvement                                                           | Not significant                     | Not included                     |
| B symptoms                                                                         | <b>2.30 (1.30-4.08), p=0.004</b>    | Not significant                  |
| Largest mass ≥5cm                                                                  | Not significant                     | Not included                     |
| High risk MIPI                                                                     | Not included                        | Not significant                  |
| BR                                                                                 | <b>0.40 (0.17-0.94), p=0.036</b>    | 0.33 (0.10-1.10), p=0.070        |
| <b>Multivariate analysis including maintenance rituximab (n=108 PFS, n=126 OS)</b> |                                     |                                  |
| Age >65 at chemo start                                                             | Not included                        | Not significant                  |
| Performance status >1                                                              | Not significant                     | <b>2.45 (1.17-5.12), p=0.018</b> |
| Elevated LDH                                                                       | Not significant                     | Not included                     |
| Marrow/blood involvement                                                           | Not significant                     | Not included                     |
| B symptoms                                                                         | <b>2.15 (1.20-3.85), p=0.010</b>    | Not significant                  |
| Largest mass ≥5cm                                                                  | Not significant                     | Not included                     |
| High risk MIPI                                                                     | Not included                        | Not significant                  |
| BR                                                                                 | <b>0.42 (0.17-0.99), p=0.047</b>    | 0.32 (0.09-1.07), p=0.064        |
| Maintenance rituximab                                                              | <b>0.26 (0.09-0.76), p=0.014</b>    | <b>0.34 (0.13-0.89), p=0.028</b> |
